## THE ANESTHESIOLOGIST'S BOOKSHELF

HUBERTA M. LIVINGSTONE, M.D., *Editor*

**Local Anesthesia and Pain Control in Dental Practice.** By LEONARD M. MONHEIM, B.S., M.S., D.D.S., Professor and Head of Department of Anesthesia, University of Pittsburgh School of Dentistry; Assistant Professor Department of Surgery (Anesthesia), University of Pittsburgh, School of Medicine. Cloth \$8.75. Pp. 299, with 128 illustrations. C. V. Mosby Company, 3207 Washington Blvd., St. Louis 3, Missouri, 1957.

This book covers, in adequate detail, anesthesia as related to dentistry. The information about regional blocks required in the practice of dentistry is especially excellent. The book is divided into fourteen chapters which cover pain, the trigeminal nerve, regional analgesia, techniques of regional anesthesia and analgesia, local anesthetics and anesthetic solutions, anesthetic complications, office emergencies, vasoconstriction, preanesthetic evaluation and choice of anesthetic, hypalgesia in dentistry, preanesthetic medication, post-operative control of pain, armamentarium, sterilization, and medicolegal aspects of regional analgesia. This volume is written so that the dental student may readily grasp the important points and is well organized for quick reference. The illustrations, printing, paper and binding are excellent, and the index, adequate.

This book is well written and is highly recommended for the teaching and training of dental students in dental block anesthesia and the problems encountered in the relief of pain in the dental patient.

V. K. STOELTING, M.D.

**A Manual of Pharmacology.** Eighth Edition. By TORALD SOLLMANN, M.D., Professor Emeritus of Pharmacology and Materia Medica, School of Medicine, Western Reserve University, Cleveland, Ohio. Cloth \$20.00. Pp. 1,535, and 10,900 references. W. B. Saunders Company, West Washington Square, Philadelphia, 1957.

The fact that this volume has reached its eighth edition speaks for the quality of the author's work. This text does what the author indicates in his preface: "... to furnish a guide through the complexities of modern pharmacology . . . the actions and uses of drugs. Contributions to this subject are being published at an ever-accelerating rate and the wealth of material is indeed confusing. The Manual aims to summarize critically the chief features of these contributions."

The content includes the pertinent information available on modern pharmacology, as well as considerable background concerning drugs that had more use in earlier days. A valuable feature of this text is that the material that all students should aim to know is printed in ordinary type and much material to be consulted as special occasion arises is printed in small type. There are no illustrations, and the chemical formulas as presented in earlier editions have been nearly completely eliminated. Only a few tables are presented in the entire book. The bibliography is quite adequate. The style of writing makes for easy reading, and the binding and paper are satisfactory. The amount of new material included indicates that although Dr. Sollmann may have retired as a Professor, he has certainly continued to be active as an author.

A few minor contradictions appear; for example, on page 395, "The pulse may be unchanged or considerably slowed (by scopolamine)," whereas on page 398, still referring to scopolamine, we find "it increases the heart rate." Similarly referring to meperidine on page 282, "Analgetic doses cause little or no respiratory depression; it is therefore safer than morphine or methadone for obstetric analgesia," and on page 285, "Obstetrical
